# Supplementary material for: Influence of Alloying Elements on the Mechanical Properties of Anodized Aluminum and on the Adhesion of Copper Metallization
Source: MDPI journal article supplement (doi:10.3390/ma14227028), 2021-11-19
Supplement: s1 [file s1]

## Supplementary material

# Influence of Alloying Elements on the Mechanical Properties of Anodized Aluminum and on the Adhesion of Copper Metallization

Oleg S. Medvedev <sup>1,\*</sup>, Ekaterina E. Alyasova <sup>1</sup>, Rona E. Besprozvannaya <sup>1</sup>, Asadula A. Gadzhiev <sup>1</sup>,  
Veronika V. Krivova <sup>1</sup>, Andrey S. Kondratev <sup>1</sup>, Artem E. Kim <sup>2</sup>, Pavel A. Novikov <sup>2</sup> and Anatoliy A. Popovich <sup>2</sup>

<sup>1</sup> LLC "Rusoxide", 143026 Skolkovo, Moscow, Russia; aee@rusoxide.ru (E.E.A.); bre@rusoxide.ru (R.E.B.);  
gaa@rusoxide.ru (A.A.G.); kvv@rusoxide.ru (V.V.K.); kas@rusoxide.ru (A.S.K.)

<sup>2</sup> Peter the Great Saint-Petersburg Polytechnic University, 195251 Saint Petersburg, Russia;  
artem\_7.kim@mail.ru (A.E.K.), novikov\_pa@spbstu.ru (P.A.N.) director@immet.spbstu.ru (A.A.P.)

\* Correspondence: medvedev.os1990@gmail.com

**Table S1.** The weight elemental composition of investigated aluminum alloys.

| Alloy | Al    | Si     | Fe     | Cu     | Mn     | Mg     | Cr     | Zn     | Ti     | Ni     |
|-------|-------|--------|--------|--------|--------|--------|--------|--------|--------|--------|
| AA#1  | 99.3  | 0.107  | 0.380  | 0.147  | 0.004  | 0.006  | 0.002  | 0.008  | 0.01   | 0.003  |
| AA#2  | 99.5  | 0.095  | 0.252  | 0.057  | 0.006  | 0.015  | 0.002  | 0.008  | 0.020  | 0.005  |
| AA#3  | 99.5  | 0.041  | 0.279  | 0.008  | 0.005  | 0.005  | 0.003  | 0.006  | 0.134  | 0.008  |
| AA#4  | 99.99 | <0.003 | <0.003 | <0.002 | <0.002 | <0.001 | <0.002 | <0.002 | <0.002 | <0.002 |

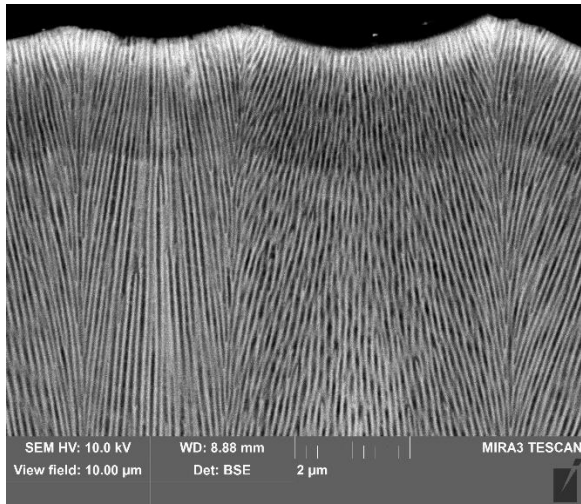

(a)

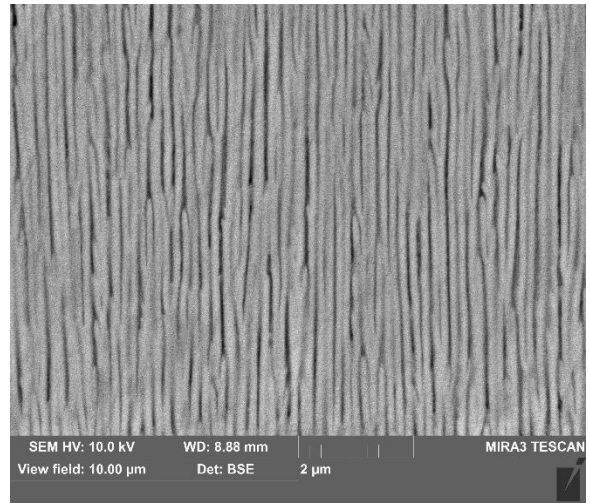

(b)

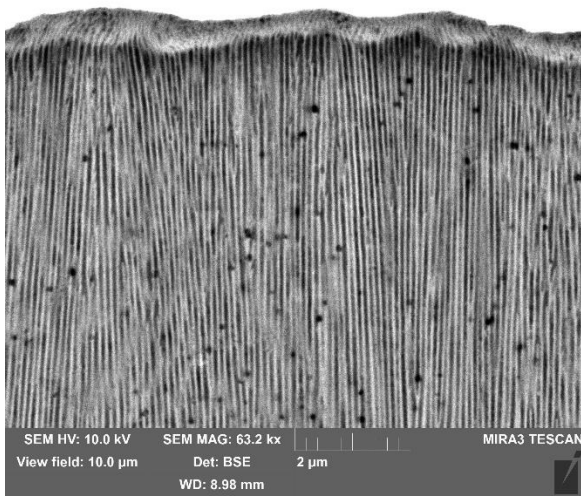

(c)

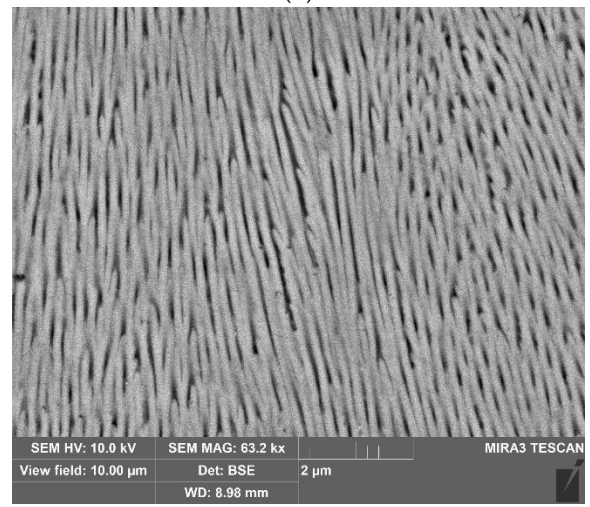

(d)

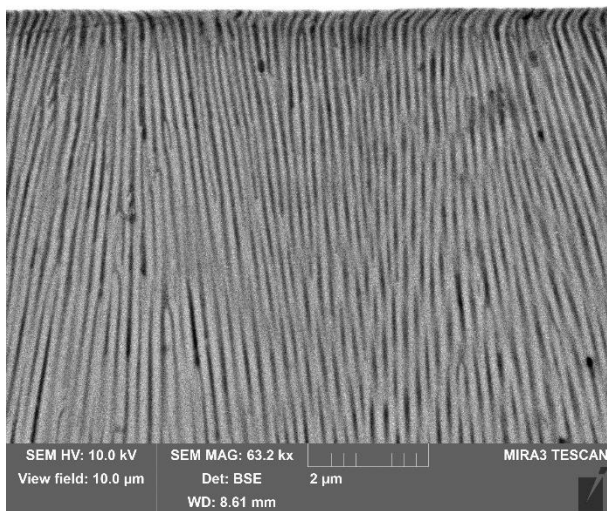

(e)

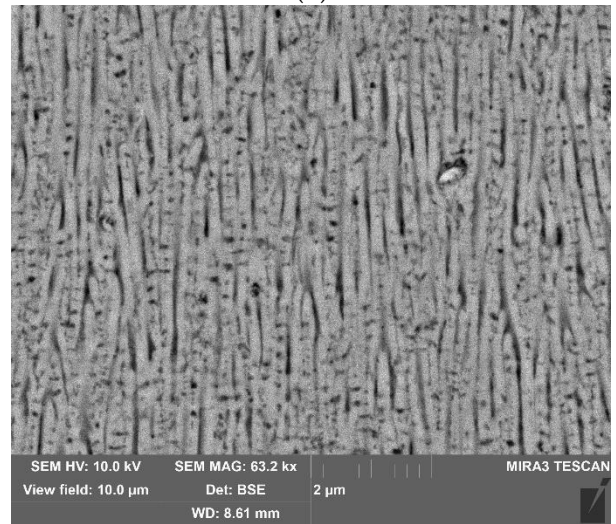

(f)

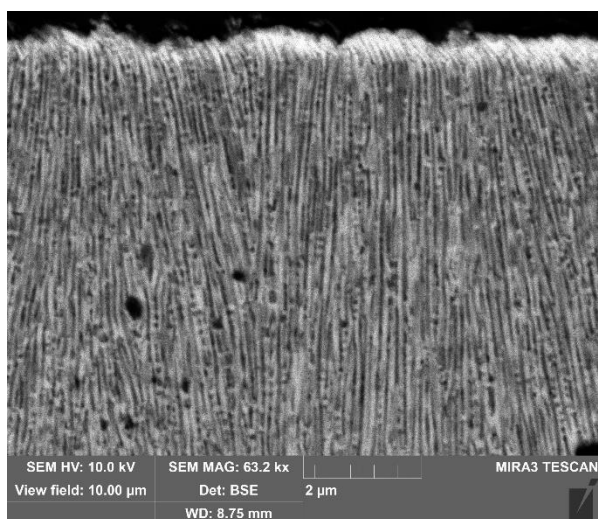

(g)

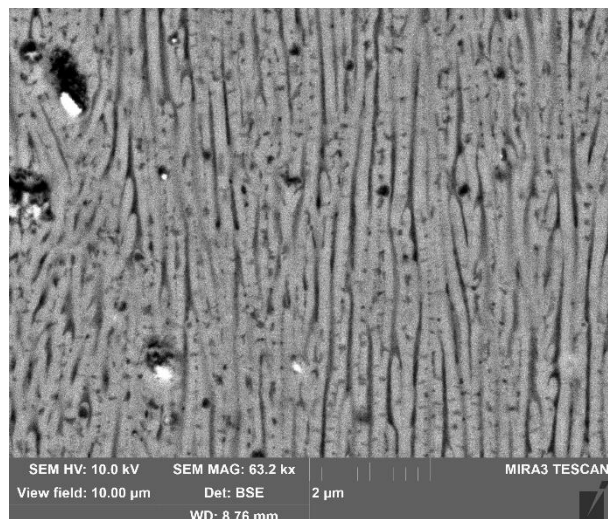

(h)

**Figure S1.** Scanning electron images of cross section AA#4 (a, b), AA#3 (c, d), AA#2 (e, f) and AA#1 (g, h). SEM images (a, c, e and g) obtained near the surface of anodic aluminum oxide, images (b, d, f and h) – near the interface of anodic aluminum oxide and bulk aluminum.
